# Supplementary material for: Systematically Studying Kinase Inhibitor Induced Signaling Network Signatures by Integrating Both Therapeutic and Side Effects
Source: PLoS One. 2013 Dec 5;8(12):e80832. doi: 10.1371/journal.pone.0080832 (PMC3855094; doi:10.1371/journal.pone.0080832)
Supplement: Text S2 — Mathematical model for primary human hepatocyte pathway. (DOCX) [file pone.0080832.s005.docx]

**Text S2. Mathematical model for primary human hepatocyte pathway**
